# Supplementary material for: Mild and selective transfer hydrogenation of biomass-derived furfural to furfuryl alcohol over Cu/ZnO/Al2O3 with methanediol as the hydrogen donor
Source: Royal Society of Chemistry journal article supplement (doi:10.1039/d4gc00160e), 2024-01-01
Supplement: d4gc00160e1.pdf [file d4gc00160e1.pdf]

## Supporting Information

### Mild and selective transfer hydrogenation of biomass-derived furfural to furfuryl alcohol over Cu/ZnO/Al<sub>2</sub>O<sub>3</sub> with methanediol as hydrogen donor

Shubin Cheng,<sup>a,b</sup> Qian Lei,<sup>a,b</sup> Conger Deng,<sup>a</sup> Linlin Liang,<sup>a</sup> Yan Chen,<sup>a,b</sup> Huiwen Meng,<sup>a,b</sup> Weixin Lei,<sup>a</sup> and Honglin Chen <sup>\*a,b</sup>

### Supplementary figures and data

Table S1 Comparison of textural properties of fresh (0h) and reacted (6 h) CZA Catalysts.

| Catalyst   | S <sub>BET</sub><br>(m <sup>2</sup> /g) | d <sub>Cu</sub><br>(nm) | V <sub>p</sub><br>(cm <sup>3</sup> /g) | D <sub>average</sub><br>(nm) |
|------------|-----------------------------------------|-------------------------|----------------------------------------|------------------------------|
| CZA-fresh  | 75.6                                    | 6.6                     | 0.216                                  | 5.7                          |
| CZA-6h-108 | 71.0                                    | 13.7                    | 0.129                                  | 7.3                          |
| CZA-6h-180 | 79.5                                    | 13.0                    | 0.120                                  | 6.0                          |

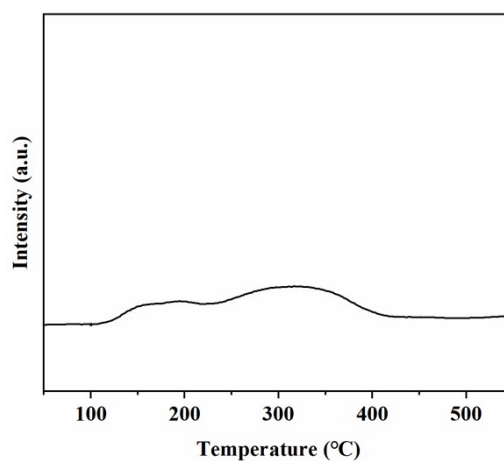

Fig. S1. The CO<sub>2</sub>-TPD spectra of the purchased catalysts.

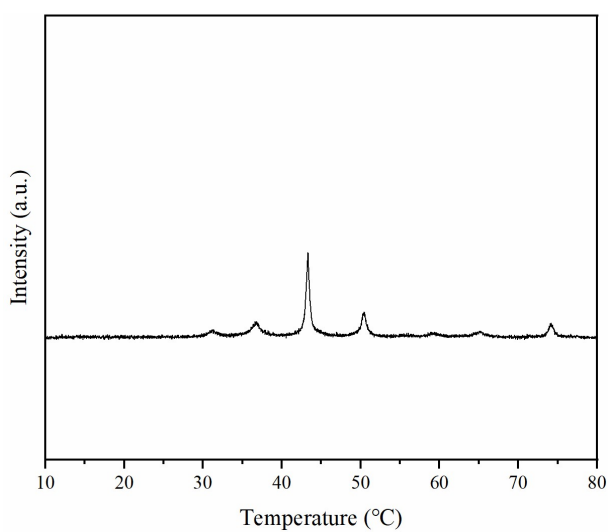

Fig. S2. XRD spectra of the used CZA catalyst at 180°C.

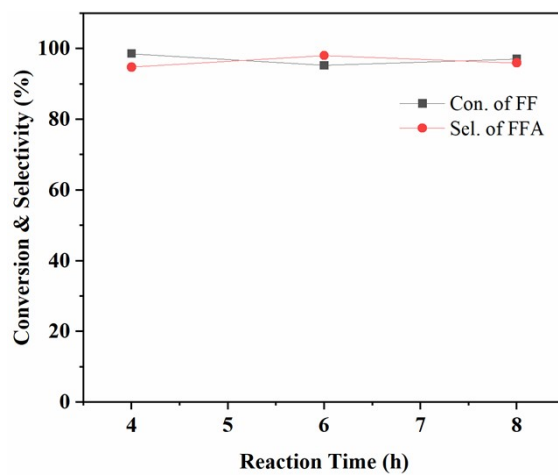

Fig. S3. The stability of CZA catalysts during the CTH of FF to FFA with formaldehyde water as hydrogen donor. Reaction conditions: FF (5 wt%), formaldehyde (5 wt%), water (15 wt%), solvent (1,3-dioxolane), catalyst (15 mL), T=108°C, P=0.1 MPa,  $\tau=1.2$  h<sup>-1</sup>, N<sub>2</sub> atmosphere.

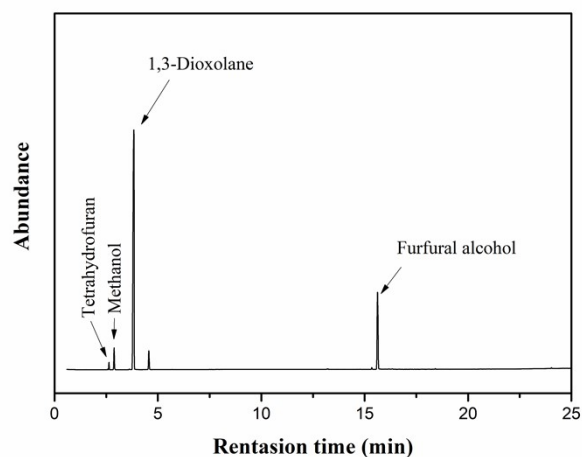

Fig. S4. GC-MS spectrum of the liquid phase product of CZA-catalyzed transfer hydrogenation of furfural with methanediol as hydrogen donor (108 °C).

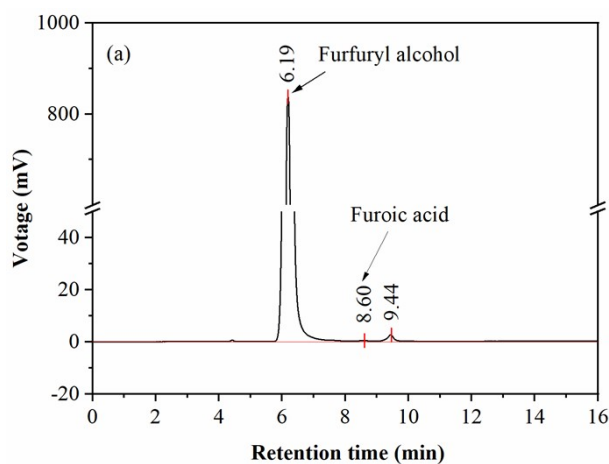

| Peak | Retention time (min) | Area     | Area % |
|------|----------------------|----------|--------|
| 1    | 6.19                 | 10141248 | 99.62  |
| 2    | 8.60                 | 3575     | 0.035  |
| 3    | 9.44                 | 34848    | 0.342  |

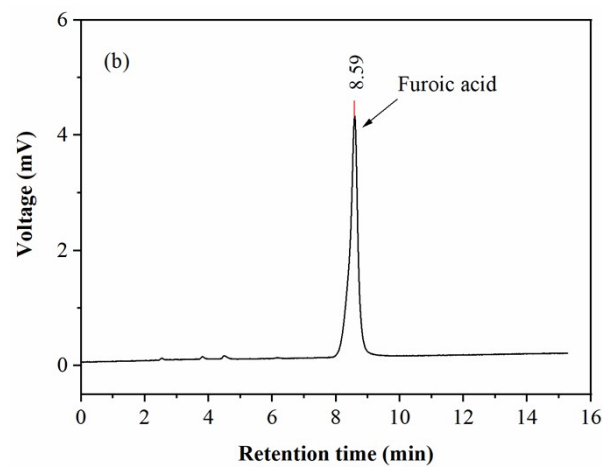

| Peak | Retention time (min) | Area  | Area % |
|------|----------------------|-------|--------|
| 1    | 8.59                 | 76258 | 100    |

Fig. S5. High-performance liquid chromatography (HPLC) of (a) CTH product at 108°C and (b) ~0.1 wt‰ furoic acid standard substance.
